# Supplementary material for: Intra-hypothalamic circuit orchestrates β-endorphin release following coital ejaculation in male mice
Source: Research Square preprint supplement (doi:10.21203/rs.3.rs-5107470/v1), 2024-10-03
Supplement: Supplementary file 1 [file b4ff21b415c3179c32d67d1e.docx]

**Supplementary Table**

| **Figure** | **Sample Size (n)** | **﻿Statistical test** | **p value** | | | **Sexual experience** | **Genetic strain** |
| --- | --- | --- | --- | --- | --- | --- | --- |
| Figure1a-1f | Ejaculation, 3 males  Intromission, 3 males | Chi-squared test followed by FDR correction | % Fos, p value, ****, <0.0001;  %Npas4, p value, ****, <0.0001; | q value, ****, <0.0001  q value, ****, <0.0001 | | Experienced | C57BL/6 |
| Figure1g | Ejaculation, 4 males  Intromission, 4 males | Unpaired t test | % Calb1-Fos: **, 0.0020 | | | Experienced | C57BL/6 |
| Figure2c | Calb1Cre-DioGCamp, 4 males  Calb1Cre-FasGCamp, 5 males | Unpaired t test | ****, <0.0001 | | | Experienced | C57BL/6 |
| Figure2d-2f | Calb1Cre-DioGCamp, 11 males  Calb1Cre-FasGCamp, 6 males | Unpaired t test  Unpaired t test with Welch's correction | Ejaculation onset latency, ns, 0.5525  Ejaculation average signal, ***, 0.0007 | | | Experienced | C57BL/6 |
| Unpaired t test  Unpaired t test | Mount onset latency, *, 0.0194  Mount average signal, ns, 0.2429 | | |
| Unpaired t test  Unpaired t test | Intromit onset latency, **, 0.0093  Intromit average signal, ns, 0.9126 | | |
| Figure2h | Calb1Cre-DioNpHR, 12 NpHR+ cells from 2 males | RM one-way ANOVA followed by Šídák's multiple comparisons test | ANOVA- p value: **, 0.0023; Pre vs On: **, 0.0097; On vs Post: **, 0.0082; Pre vs Post: ns, 0.9914 | | | Naïve | C57BL/6 |
| Figure2i-2m | Calb1Cre-NpHR, 8 males | Log-rank (Mantel-Cox) test  Unpaired t test  Log-rank (Mantel-Cox) test  Log-rank (Mantel-Cox) test  Unpaired t test  Unpaired t test | Ejaculation happen survival curve, *, 0.0338  Post intro Ejaculation latency, *, 0.0191  Mount happen survival curve, ns, 0.8004  Intromission happen survival curve, ns, 0.9100  Intromission total duration, ***, 0.0006  Intromission mean duration, ns, 0.1106 | | | Experienced | C57BL/6 |
| Figure3a-3b | Calb1Cre-DioChR2mCherry, 4 males  Calb1Cre-FasChR2mCherry, 5 males | Unpaired t test | ****, <0.0001 | | | Naïve | C57BL/6 |
| Figure3c-3e | PomcCre-RVGFP, 4 males | / | / | | | Naïve | C57BL/6 |
| Figure3f-3h | Adcyap1Cre-DioChR2, 3 males  Adcyap1Cre-DioEYFP, 3 males | Unpaired t test | *, 0.0301 | | | Experienced | C57BL/6 |
| Figure3i-3k | Ejaculation, 3 males  Intromission, 3 males | Unpaired t test | *, 0.0198 | | | Experienced | C57BL/6 |
| Figure3l-3n | Ejaculation, 4 males  Intromission, 4 males | Unpaired t test with Welch's correction  Unpaired t test | Pomc+ neurons: *, 0.0177  Pomc- neurons: ns, 0.2664 | | | Experienced | C57BL/6 |
| Figure3o-3q | Calb1Cre-Casp3, 5 males  Calb1Cre-EYFP, 4 males | Unpaired t test  Unpaired t test | No. ACTH-Fos neuronal numbers, *, 0.0143  % ACTH-Fos/ACTH, *, 0.0299 | | | Experienced | C57BL/6 |
| Figure4a-4c | PomcCre-DioGCamp, 6 males | One sample t test | Sniff: ns, 0.157; Mount: ns, 0.0708; Intromission: ns, 0.5020; Ejaculation: **, 0.0067 | | | Experienced | C57BL/6 |
| Figure4d-4f | AgrpCre-DioGCamp, 6 males | One sample t test | Sniff: ns, 0.2804; Mount: ns, 0.3587; Intromission: ns, 0.8190; Ejaculation: ns, 0.6072 | | | Experienced | C57BL/6 |
| Figure4g-4i | PomcCre-DioGCamp, 5 males | One sample t test | Sniff: ns, 0.1183; Mount: ns, 0.2915; Intromission: ns, 0.3055; Ejaculation: **, 0.0045 | | | Experienced | B6D2F1 |
| Figure4l | Ejaculation, 9 males  Intromission, 7 males | Unpaired t test | **, 0.0015 | | | Experienced | B6D2F1 |
| Figure5c | C57BL/6: 12 males  B6D2F1: 13 males | Paired t test  Paired t test  Paired t test | Ejaculation chamber duration: ***, 0.0004  Intromission chamber duration: *, 0.0134  CPP Ratio: **, 0.0021 | | | Experienced | C57BL/6 & B6D2F1 |
| Figure5e | PomcCre-EYFP: 12 males | Paired t test | CPP Ratio: ns, 0.1236 | | | Experienced | C57BL/6 |
| Figure5f | PomcCre-MonStim1: 11 males | Paired t test  Paired t test  Paired t test | LaserOn chamber duration: *, 0.0193  LaserOff chamber duration: **, 0.0077  CPP Ratio: **, 0.0066 | | | Experienced | C57BL/6 |
| Figure5g | PomcCre-EYFP: 8 males  PomcCre-MonStim1: 8 males | Mann-Whitney test | **, 0.0030 | | | Experienced | C57BL/6 |
| Figure5i | Saline: 13 males  CTAP: 14 males  SHU9119: 14 males | Paired t test  Paired t test  Paired t test | Saline CPP Ratio: *, 0.0192  CTAP CPP Ratio: *, 0.0330  SHU9119 CPP Ratio: *, 0.0495 | | | Experienced | B6D2F1 |
| Figure5j | CTAP & SHU9119: 8 males | Paired t test  Paired t test  Paired t test | Ejaculation chamber duration: ns, 0.1293  Intromission chamber duration: ns, 0.2670  CPP Ratio: ns, 0.1519 | | | Experienced | B6D2F1 |
| Extended Figure3b | Ejaculation, 4 males  Intromission, 4 males | Unpaired t test | % Adcyap1-Fos: *, 0.0446 | | | Experienced | C57BL/6 |
| Extended Figure4 | Calb1Cre-FasEYFP, 5 males  Calb1Cre-DioEYFP, 6 males  PomcCre-DioEYFP, 3 males | / | / | | | Experienced | C57BL/6 |
| Extended Figure5a-5c | Calb1Cre-FasChR2mCherry, 3 males  Calb1Cre-FasEYFP, 3 males  Calb1Cre-DioChR2mCherry, 8 males  Calb1Cre-DiomCherry, 3 males | Unpaired t test  Unpaired t test | FasEYFP vs FasChR2mCherry: **, 0.0013  DiomCherry vs DioChR2mCherry: ***, 0.0004 | | | Naïve | C57BL/6 |
| Extended Figure5d-5f | Calb1Cre-FasChR2, 11 males  Calb1Cre-FasEYFP, 5 males | RM one-way ANOVA followed by Šídák's multiple comparisons test  RM one-way ANOVA followed by Šídák's multiple comparisons test | FasEYFP: ANOVA- Pvalue: ns, 0.4444; Pre vs On: ns, >0.9999; On vs Post: ns, 0.9296; Pre vs Post: ns, 0.9296  FasChR2: ANOVA- Pvalue: *, 0.0286; Pre vs On: ns, 0.0676; On vs Post: ns, 0.0515; Pre vs Post: / | | | Naïve | C57BL/6 |
| Extended Figure5g-5i | Calb1Cre-DioChR2, 14 males  Calb1Cre-DiomCherry, 10 males | RM one-way ANOVA followed by Šídák's multiple comparisons test  RM one-way ANOVA followed by Šídák's multiple comparisons test  Mann-Whitney test | DioChR2: ANOVA- Pvalue: ns, 0.1490; Pre vs On: ns, 0.2757; On vs Post: /; Pre vs Post: /  DiomCherry: ANOVA- Pvalue: ns, 0.1368; Pre vs On: ns, 0.4800; On vs Post: ns, 4822, Pre vs Post: /,  On: DiomCherry vs DioChR2: **, 0.0047 | | | Naïve | C57BL/6 |
| Extended Figure6b | Calb1Cre-Casp3, 7 males  Calb1Cre-EYFP, 9 males | Mann-Whitney test | ***, 0.0002 | | | Experienced | C57BL/6 |
| Extended Figure6c | Calb1Cre-Casp3, 17 males  Calb1Cre-EYFP, 16 males | Log-rank (Mantel-Cox) test | Mount happen survival curve, ns, 0.1841 | | | Experienced | C57BL/6 |
| Extended Figure6d | Calb1Cre-Casp3, 17 males  Calb1Cre-EYFP, 16 males | Log-rank (Mantel-Cox) test  Unpaired t test | Intromission happen survival curve, ns, 0.1108  Intromission total duration, ns, 0.0684 | | | Experienced | C57BL/6 |
| Extended Figure6e | Calb1Cre-Casp3, 13 males  Calb1Cre-EYFP, 11 males | Log-rank (Mantel-Cox) test  Unpaired t test | Ejaculation happen survival curve, ns, 0.0571  Post intro Ejaculation latency, **, 0.0082 | | | Experienced | C57BL/6 |
| Extended Figure 7a-7c | Calb1Cre-DioChR2mCherry, 4 males  Calb1Cre-FasChR2mCherry, 5 males | Unpaired t test followed by FDR correction | p value: PVH: ns, 0.8717; DMH: ns, 0.9747; LH: ns, 0.3698; VMHvl: ***, 0.0006; ARC: **, 0.0078; PMv: *, 0.0339; VTA: ns, 0.5275; aPAG: ns, 0.7959; pPAG: ns, 0.6231; PMC: *, 0.0372 | | q value: PVH: ns, 0.8804; DMH: ns, 0.8860; LH: ns, 0.6225; VMHvl: **, 0.0051; ARC: *, 0.0353; PMv: ns, 0.0846; VTA: ns, 0.7992; aPAG: ns, 0.8805; pPAG: ns, 0.8091; PMC: ns, 0.0846 | Naïve | C57BL/6 |
| Extended Figure 8a | PomcCre, 2 males | / | / | | | Naïve | C57BL/6 |
| Extended Figure 8b | Calb1Cre-Gcamp, 10 males  PomcCre-GCamp, 6 males | Unpaired t test with Welch's correction  Mann-Whitney test | Signal duration: *, 0.0217  Signal Latency: ***, 0.0002 | | | Experienced | C57BL/6 |
| Extended Figure 8c | PomcCre, 2 males | / | / | | | Naïve | B6D2F1 |
| Extended Figure 9c | PomcCre-GCamp, 2 males | / | / | | | Experienced | C57BL/6 |
| Extended Figure 9g | PomcCre-RV-tdTomato, 6 males | / | / | | | Naïve | C57BL/6 |
