# Supplementary material for: Intra-hypothalamic circuit orchestrates β-endorphin release following coital ejaculation in male mice
Source: Research Square preprint supplement (doi:10.21203/rs.3.rs-5107470/v1), 2024-10-03
Supplement: Supplementary file 5 [file a52b47084ee7b4c9b2f63a90.pdf]

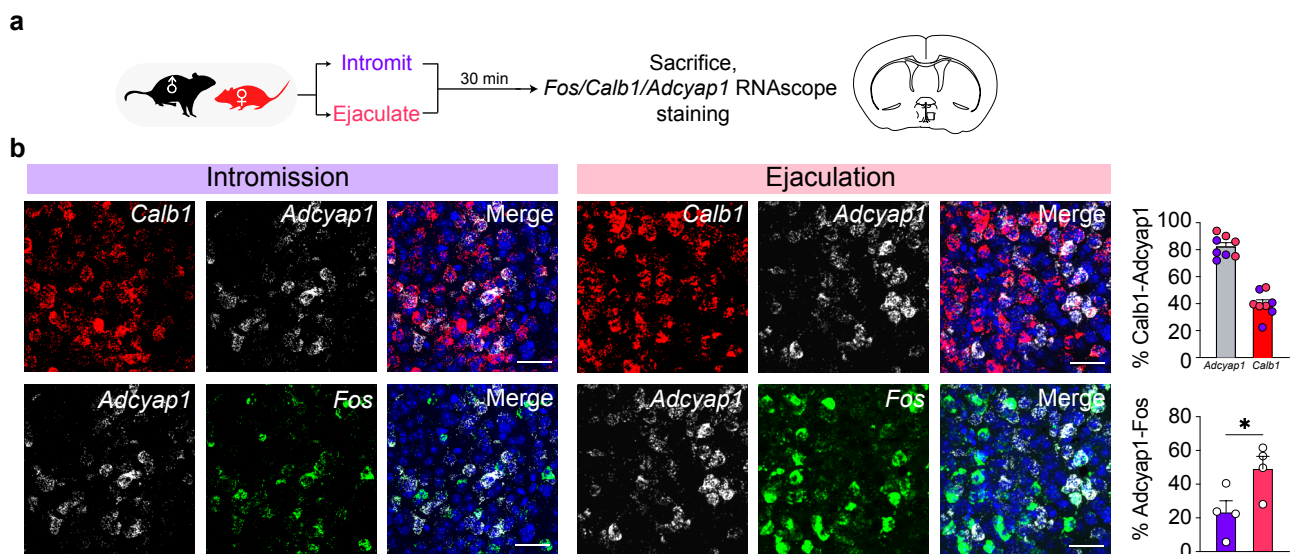

**Extended Data Figure 3. A subset of POA *Calb1*<sup>+</sup> neurons co-express *Adcyap1* and are activated following ejaculation.**

**a.** Schematics of the experimental procedure. C57BL/6 male mice underwent a mating test, during which they either achieved ejaculation or intromission. Thirty minutes after the test, the mice were sacrificed, and their brains were processed for fluorescent *in situ* hybridization to detect *Calb1*, *Adcyap1* and *Fos* signals using RNAscope kits.

**b.** Example images (left) and quantification (right) show the overlap between *Calb1*<sup>+</sup> and *Adcyap1*<sup>+</sup> signals (top row), and *Adcyap1*<sup>+</sup> and *Fos*<sup>+</sup> signals (bottom row) under the intromission (left, blue) and ejaculation (right, red) conditions. Scale bar, 50  $\mu$ m. n = 4 males/group.

Values are presented as mean  $\pm$  SEM. \*p < 0.05.
