# Supplementary material for: Intra-hypothalamic circuit orchestrates β-endorphin release following coital ejaculation in male mice
Source: Research Square preprint supplement (doi:10.21203/rs.3.rs-5107470/v1), 2024-10-03
Supplement: Supplementary file 7 [file ea9c8bc1b9b8660087163ac1.pdf]

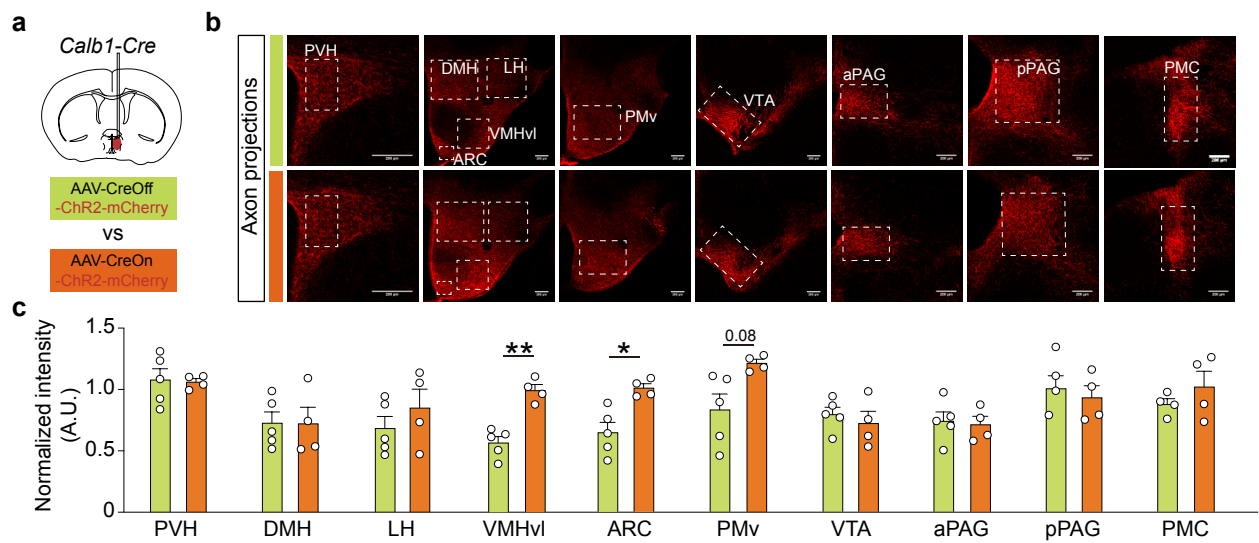

**Extended Data Figure 7. Denser innervation of ARC and the ventrolateral division of VMH (VMHvl) by POA *Calb1*<sup>+</sup> neurons**

**a.** Schematic representation of the experimental procedure: AAVs encoding Cre-Off or Cre-On ChR2-mCherry were injected into the POA of *Calb1-Cre* male mice to label the axon terminals of *non-Calb1* and *Calb1*<sup>+</sup> neurons respectively. Scale bar, 200  $\mu$ m.

**b.-c.** Representative images (**b**) and quantification and comparison of axon projection strength of POA *non-Calb1* (top row, green) and *Calb1*<sup>+</sup> (bottom row, red) neurons in indicated brain regions.  $n = 4$  *Calb1*<sup>+</sup> males and 5 *non-Calb1* males

Values are presented as mean  $\pm$  SEM. \* adjusted  $p < 0.05$ , \*\* adjusted  $p < 0.01$ .
